# Supplementary material for: Chalcone Synthase-Encoding RdCHS1 Is Involved in Flavonoid Biosynthesis in Rhododendron Delavayi
Source: Preprints.org preprint supplement (doi:10.20944/preprints202401.1342.v1), 2024-01-17
Supplement: Supplementary file 1 [file supplementary]

**Table S4 HPLC-ESI-MSanalysis of anthocyanin extracts of *RdCHS1* over-expressing transgenic tobacco flowers**

| **Peak number** | **Identifacation/tentative**  **identification** | **Retention time (min)** | **ESI-MS (m/z)** |
| --- | --- | --- | --- |
| **1** | **Cyanidin 3-*O*-rutinoside** | **34.51** | **287.1**  **595.2** |
| **2** | **Cyanidin 3-*O*-(6-*O*-malonyl-beta-D-glucoside)** | **40.23** | **287.1**  **535.1** |
